# Supplementary material
Source: Research Square preprint supplement (doi:10.21203/rs.3.rs-8880672/v1)
Supplement: Supplementary file 1 [file ba75ced694d36bdfcf338d26.pdf]

**Questionnaire - Nutritional Status of Children with Cerebral Palsy**

Child's Study ID..... Date of Examination.....

**A. Social demographic characteristics**

1. Child's Date of Birth.....

2. Age of mother/caregiver.....

3. Sex

1.  Male 2.  Female

4. Place of Birth:

1.  Hospital

2.  Home

3  Other .....

5. Religion

1.  Christian 2.  Muslim 3.  Other.

6. Residence

1.  Rural

2.  Urban

7. Mother's Education level

0  No education 1.  Primary 2  Secondary 3.  Tertiary

8. Father's Education Level

0.  No education 1.  Primary 2  Secondary 3.  Tertiary

9 .Mother's Occupation

1.  Not Employed 2.  Employed 3  Self employed 4.  Business

5  other(specify)

10. Father's occupation

1.  Not Employed 2.  Employed 3  Self employed 4.  Business

5  other(Specify)

Mothers age in years.....

11. Marital status 1  Single Married 2  Separated 3  Widow/widower 4  Other

12. Monthly income

**B. Assessment of a Child (Personal factors)**

1. Type of Cerebral Palsy

1. Spastic 2. Dyskinetic 3. Ataxic 4. Mixed

2. Anthropometry

1. Weight (in kg): \_\_\_\_\_

2. Weight for age Percentile.....

3. Length (in cm): \_\_\_\_\_

Weight for age.....

Length for age.....

Weight for height.....

4. Mid-Upper Arm Circumference (MUAC) (in cm): \_\_\_\_\_.

5. Presence of bipedal edema 1. Yes 2. No

6. Presence of Contractures

1.  Yes 0.  No

7. Associated Co-Morbidities /medical conditions (check all that apply)

Gastroesophageal reflux disease

Constipation

Recurrent respiratory infections

Seizures

other

**C. Factors associated with Malnutrition**

**Family characteristics**

1. Number of Family member.....

2. What is the relationship to child Primary care giver?

1  Mother 2  Father 3.  grandmother 4.  grandfather

3. What is the level of Education of primary care giver

0.  No education 1.  Primary 2  Secondary 3.  Tertiary.

4. What is the occupation of primary care giver1?

- Not Employed 2.  Employed 3  Self employed 4.  Business 5   
other(specify)

5. What is the main source of drinking water

- Piped water  
 Borehole  
 River or stream  
 Other

6. What is the monthly household income

7. Monthly income

1. less than 50,000MK  
2. 50000MK-100,000MK  
3. 100,000mk-200,000mk  
4. 200,000MK above

### **Feeding history**

1. Maintained Exclusive breastfeeding for the first 6 months

1.  Yes  
2.  No

2. Does the child have Problems /difficult in Feeding

1.  Yes 2.  No

3. If yes, what type of Feeding Difficulties?

- 1  Chewing  
2  Swallowing  
3  Refusal to eat /loss of appetite  
4  Reflux  
5.  Reflux

4. Consistency of Food

1.  Liquid 2.  both liquid/Solid 3.  Blended

5. How does the child feed?

1. Orally 2. NGT 3. Other

6. How many meals does the family afford regularly

1. one time 2 Twice 3. Three times 4. Four times 5. more than five

**Other**

1. Does the child get nutritional support services ? (Check one)

1. Yes 2. No

2. Recent infections/Hospitalization in Past 6 Months:

1.  Yes 2.  No

3. Do you have Financial Burdens Due to Child's Condition?

1.  Yes 2.  No

**End of Questionnaire**
